1                                   **Sex-limited diversification of the eye in *Heliconius* butterflies**

2   Nathan P. Buerkle<sup>1†</sup>, Nicholas W. VanKuren<sup>2</sup>, Erica L. Westerman<sup>2‡</sup>, Marcus R. Kronforst<sup>2</sup>, and  
3                                   Stephanie E. Palmer<sup>1,3</sup>

4                                   <sup>1</sup> Department of Organismal Biology and Anatomy

5                                   <sup>2</sup> Department of Ecology and Evolution

6                                   <sup>3</sup> Department of Physics

7                                   University of Chicago, Chicago, IL 60637, USA

8   † Present address: Department of Neuroscience, Yale University, New Haven, Connecticut

9   ‡ Present address: Department of Biological Sciences, University of Arkansas, Fayetteville,  
10                                   Arkansas

11  
12  
13   **Keywords:**

14   butterflies, color vision, photoreceptors, sexual dimorphism

15  
16  
17  
18  
19  
20  
21  
22  
23  
24  
25  
26  
27  
28  
29  
30  
31  
32  
33  
34

## 35 **Abstract**

36  
37 Butterflies have evolved an immense diversity in eye organization to support a range of vision-  
38 based behaviors including courtship, oviposition, and foraging. This diversity has been surveyed  
39 extensively across the butterfly phylogeny, and here we take a complementary approach to  
40 characterize the eye within a group of closely related *Heliconius* butterflies. Using a combination  
41 of immunostaining for different opsins and eyeshine for determining the distribution of light-  
42 filtering screening pigments, we identified several sexually dimorphic features of eye  
43 organization where male eyes varied and female eyes did not. Ultraviolet (UV) sensitive  
44 photoreceptors varied in which of two UV opsins were expressed, including co-expression of  
45 both within single photoreceptors, and these differences were consistent with a role in courtship  
46 and conspecific identification. Additional differences across species and sex included the  
47 distribution of three ommatidial types defined by the expression pattern of UV and blue opsins,  
48 the distribution of a red screening pigment, and which ommatidial types expressed the red  
49 screening pigment. We hypothesize that female eyes are optimized for a dimorphic behavior  
50 such as oviposition, while male eyes adapt to other selective pressures such as the local light  
51 environment.

52

## 53 **Introduction**

54  
55 The organization of peripheral sensory systems plays an important role in behavior by  
56 specifying what environmental information is available to an animal (Wehner, 1987). Compared  
57 to downstream neural circuits, these peripheral locations are an evolutionarily labile target for  
58 adaptation, allowing for potentially rapid changes that support behavioral evolution (Bendesky  
59 and Bargmann, 2011). The selective pressures that promote peripheral evolution are diverse,  
60 including factors that influence foraging, courtship, and oviposition. For example, the evolution  
61 of trichromatic color vision in primates likely functions to improve the detection of ripe fruit (Melin  
62 et al., 2017, 2013; Regan et al., 2001), while the *Drosophila sechellia* olfactory system is  
63 specialized for the detection of its noni plant host (Auer et al., 2020). For courtship, the evolution  
64 of the cichlid visual system (Seehausen et al., 2008; Terai et al., 2006) and *Heliothis* moth  
65 olfactory system can drive reproductive isolation and speciation (Gould et al., 2010; Lee et al.,  
66 2016), while sexually dimorphic plumage in warblers appears to co-evolve with sexually  
67 dimorphic visual systems (Bloch, 2015). Lastly, rather than specific behavioral contexts,  
68 peripheral systems can evolve to match the statistics of the natural environment (Lythgoe,

69 1979). These differences are commonly observed in the visual systems of aquatic animals living  
70 at different water depths (Fasick and Robinson, 2000; Fuller et al., 2003; Torres-Dowdall et al.,  
71 2017) or in birds that prefer different forest strata. Thus, the periphery can respond to a  
72 multitude of selective pressures to support a range of adaptive behaviors.

73 The visual system of butterflies presents an interesting system to explore how different  
74 selective pressures affect the organization of the eye. Butterflies have exceptional color vision  
75 that plays a prominent role in many of their behaviors. The ancestral eye likely comprised  
76 ultraviolet (UV), blue (B), and long wavelength (LW) sensitive opsins organized into ommatidia  
77 that each house nine photoreceptors (R1-R9, Fig. 1)(Briscoe, 2008). The R3-8 photoreceptors  
78 express the LW opsin, the small R9 cell has a generally unknown opsin expression, and the  
79 combination of UV and blue opsins in R1 and R2 defines three ommatidial types (UV-UV, B-B,  
80 and UV-B) that tile the eye. This photoreceptor composition is sufficient to support trichromatic  
81 color vision, and the common evolution of a red sensitive photoreceptor (Blackiston et al., 2011;  
82 Briscoe and Chittka, 2001; Frentiu et al., 2007; Zaccardi et al., 2006) can further support  
83 tetrachromatic vision (Koshitaka et al., 2008; Vorobyev and Osorio, 1998). Interestingly,  
84 however, this speciose group of insects has evolved an immense diversity in eye organization,  
85 with different species having up to fifteen unique photoreceptor types with different spectral  
86 sensitivities (Arikawa, 2003; Chen et al., 2016, 2013). This diversity encompasses duplications  
87 of all three opsins (Arikawa et al., 2005; Briscoe et al., 2010; Frentiu et al., 2007) as well as the  
88 use of screening pigments (Arikawa and Stavenga, 1997; Stavenga, 2002) that function as  
89 intraocular filters that absorb and prevent some wavelengths of light from reaching the  
90 photoreceptors.

91 This diversity in eye organization across the butterfly phylogeny highlights the  
92 evolvability of the periphery, but the extent to which the eye can evolve among closely related  
93 taxa remains unclear. Different aspects of eye organization may vary in their evolvability, such  
94 as the number of ommatidial types, photoreceptor spectral sensitivities, or the ratios of different  
95 photoreceptor types. Contrasting phylogeny-wide data with comparisons of closely related  
96 groups would help distinguish which aspects are especially evolutionarily labile. Thus, in this  
97 study we have focused on characterizing eye organization in a group of closely related  
98 *Heliconius cydno* butterflies. This genus of mimetic, Neotropical butterflies have a duplicated UV  
99 opsin (UV1 ~355 nm, UV2 ~390 nm), a blue opsin (~450 nm), a LW opsin (~550 nm), and a red  
100 opsin derived from the LW opsin and a red screening pigment (Briscoe et al., 2010; McCulloch  
101 et al., 2016; Zaccardi et al., 2006). A recent study sample 14 species from each of the major

102

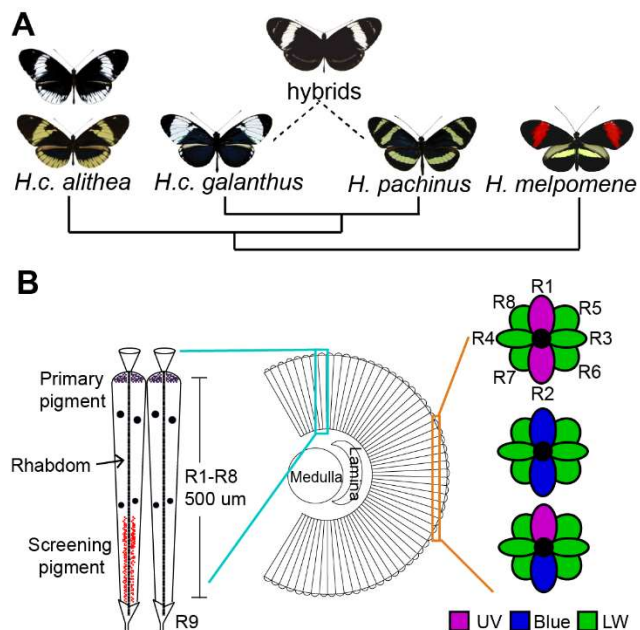

**Figure 1. Study system.** (A) Phylogenetic tree shows butterflies examined in this study, including the hybrid offspring of two sister species. Wing color is known to be a Mendelian trait, with *H.c. alithea* being polymorphic. (B) Diagram of basic eye organization shows the anatomy of individual ommatidia. The left shows a longitudinal view of two ommatidia. Note the screening pigments in the proximal portion of the ommatidia, which selectively absorbing certain wavelengths of light to shape photoreceptor spectral sensitivity. The right shows three ommatidia in cross-section, with three ommatidial types defined by which opsins are expressed in the R1 and R2 photoreceptors.

103

104

105

106 *Heliconius* clades (McCulloch et al., 2017), finding substantial differences in eye organization.  
107 This survey detected six distinct retinal mosaics defined by the different ommatidial types tiling  
108 the eye (e.g. UV1-UV1, UV2-B), ranging from three to six ommatidial types per species as well  
109 as several sexual dimorphisms.

110 In the *Heliconius cydno* butterflies we examined here (Fig. 1), males preferentially court  
111 females based predominantly on visual perception of a wing color that has Mendelian  
112 inheritance (Westerman et al., 2018), with white wings dominant to yellow. *H.c. galanthus* and  
113 *H. pacheinus* are white and yellow sister species, respectively, and both strongly prefer to mate  
114 with females with the same wing color, while their hybrid offspring court both colors equally  
115 (Kronforst et al., 2006). In the polymorphic *H.c. alithea*, yellow males prefer yellow females,  
116 while white males court both colors equally (Chamberlain et al., 2009). Thus, understanding  
117 how the eye is organized in these taxa is an important first step towards understanding the  
118 mechanisms that underlie this divergent behavior that has a simple genetic basis (Van Kuren et  
119 al., 2022). We compared eye organization across these taxa as well as the closely related  
120 *Heliconius melpomene rosina* using a combination of opsin immunostaining and eyeshine to  
121 assay screening pigments. We observed the same basic set of three ommatidial types across  
122 all butterflies suggesting the overarching organization of the eye may be phylogenetically  
123 constrained. However, we also detected significant variability in the organization of male eyes,

124 but not females, suggesting sex-limited diversification of the eye may be one way that the  
125 periphery is able to respond to different selective pressures.

126

## 127 **Results**

128

129 To characterize the organization of the eye, we first asked which ommatidial types each  
130 butterfly expressed by performing antibody staining against UV1, UV2, and blue opsins in thin  
131 cross sections of the eye (Fig. 2). Consistent with a previous report (McCulloch et al., 2017),  
132 every butterfly had a combination of UV-UV, B-B, and UV-B ommatidia (Fig. 2A). However, the  
133 specific UV opsin that was expressed differed with species and sex (Fig. 2A). First, females  
134 always expressed only UV1 regardless of taxon, but male eyes varied. *H.c. galanthus* males  
135 also expressed UV1, while its sister *H. pachinus* instead expressed UV2. Interestingly, the  
136 hybrid offspring of this pair had an intermediate phenotype, showing co-expression of both UV1  
137 and UV2 within single photoreceptors. *H.c. alithea* males of both wing colors always expressed  
138 UV2. For *H. melpomene*, we also observed co-expression of both UV1 and UV2 in all males.  
139 Surprisingly, qPCR showed within group variability in the degree of co-expression across all  
140 groups (Fig. 2B), and we similarly observed co-expression of UV1 and UV2 in three of nine *H.c.*  
141 *galanthus* and four of fifteen *H.c. alithea* (Fig. 2C).

142 We were next interested in determining the distribution of these different ommatidial  
143 types across the eye. Since no butterfly had separate UV1 and UV2 photoreceptors, we  
144 collectively referred to the expression of any UV opsin as a UV photoreceptor, and therefore  
145 counted the number of UV-UV, B-B, and UV-B ommatidia in each immunostained section. We  
146 first observed a clear dorsal-ventral difference where the dorsal ~25% of the eye was mostly  
147 UV-UV in all butterflies, and the ventral eye had a more even mix of all three ommatidial types  
148 (Fig. 3A). In these ventral slices, we counted an average of  $500.1 \pm 222.0$  ommatidia per  
149 individual. Figure 3B shows the resulting distributions, and we used hierarchical clustering to  
150 assess whether there were any differences across species and sex (Fig. 3C).

151 Hierarchical clustering detected five major clusters, four of which were predominately  
152 populated by one or two groups (Fig. 3C). The most distinct cluster primarily included *H.c.*  
153 *alithea* males of both wing color, which is consistent with visual inspection showing it was the  
154 only taxon with mostly UV-B ommatidia (Fig. 3B). *H.c. galanthus* males were split between two  
155 clusters, both characterized by eyes with mostly B-B ommatidia. One of these clusters also  
156 included most of the *H. melpomene* males, while the second was three males with especially  
157 low numbers of UV photoreceptors. Likely due to small sample size, its sister species *H.*

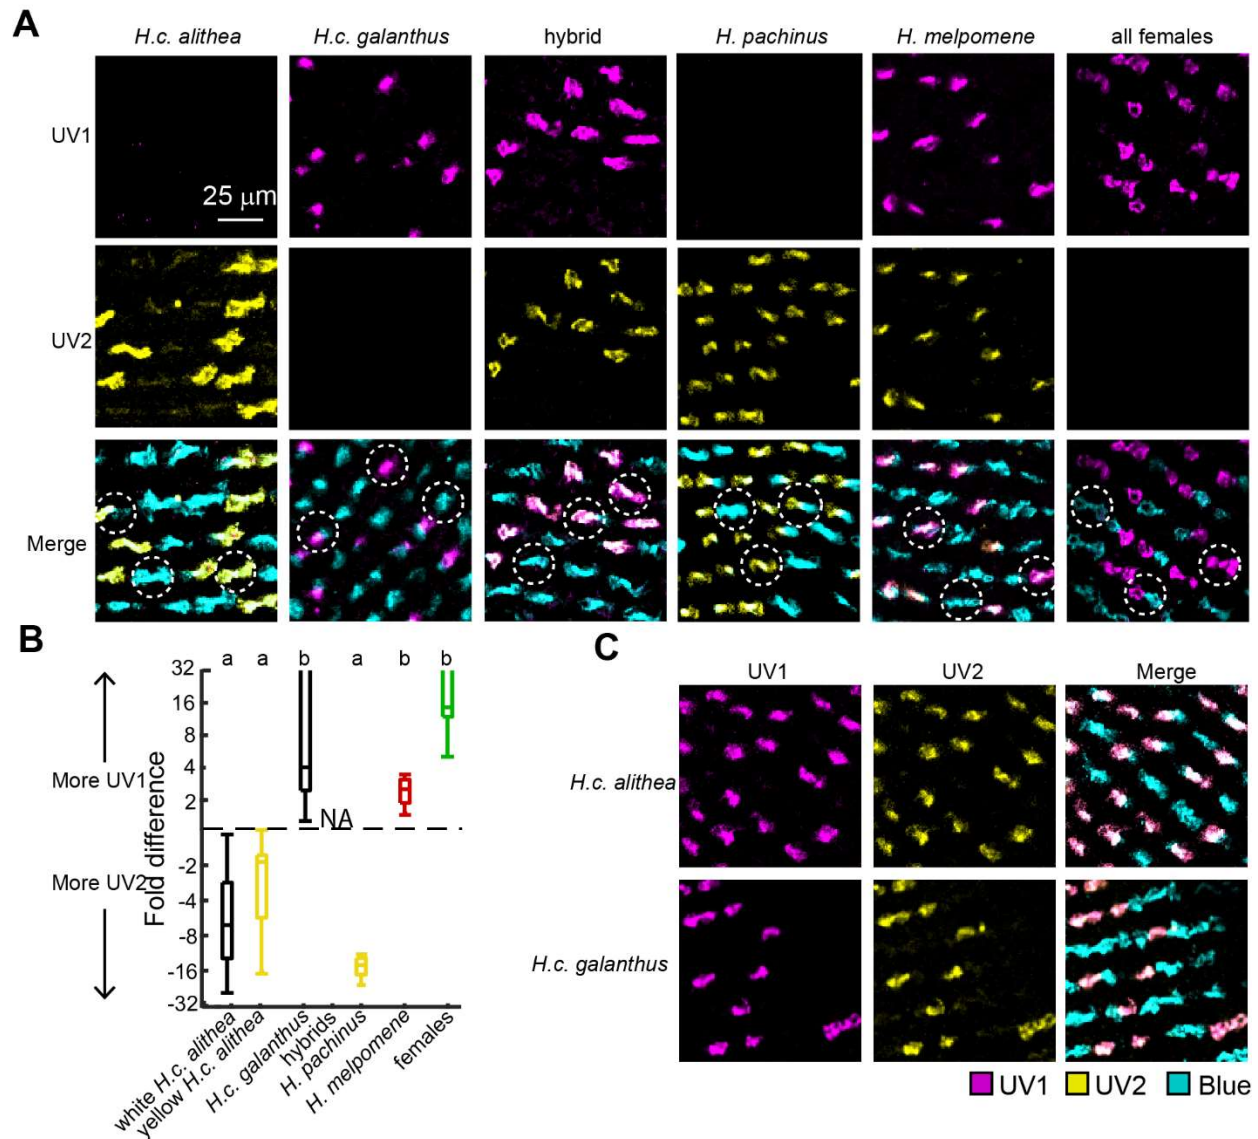

158

159 **Figure 2. Variable co-expression of two different UV opsins.** (A) Antibody staining for UV1,  
 160 UV2, and blue opsins in thin cross sections of the eye. The first five columns are representative  
 161 of males in each group, while the sixth column is representative for all females regardless of  
 162 taxon. This particular female was an *H.c. alithea*. In the bottom row, examples of the three  
 163 ommatidial types (UV-UV, B-B, and UV-B) are circled. (B) qPCR shows the relative expression  
 164 levels of UV1 and UV2 across groups on a log scale. The two bars extending off the axis are  
 165 due to individuals with no detectable UV2 expression. Each bar includes 12 individuals, but no  
 166 hybrids were used. Letters above indicate groups that are significantly different from each other.  
 167 (C) Approximately one third of *H.c. alithea* and *H.c. galanthus* males exhibited co-expression of  
 168 UV1 and UV2. Shown are two representative examples.

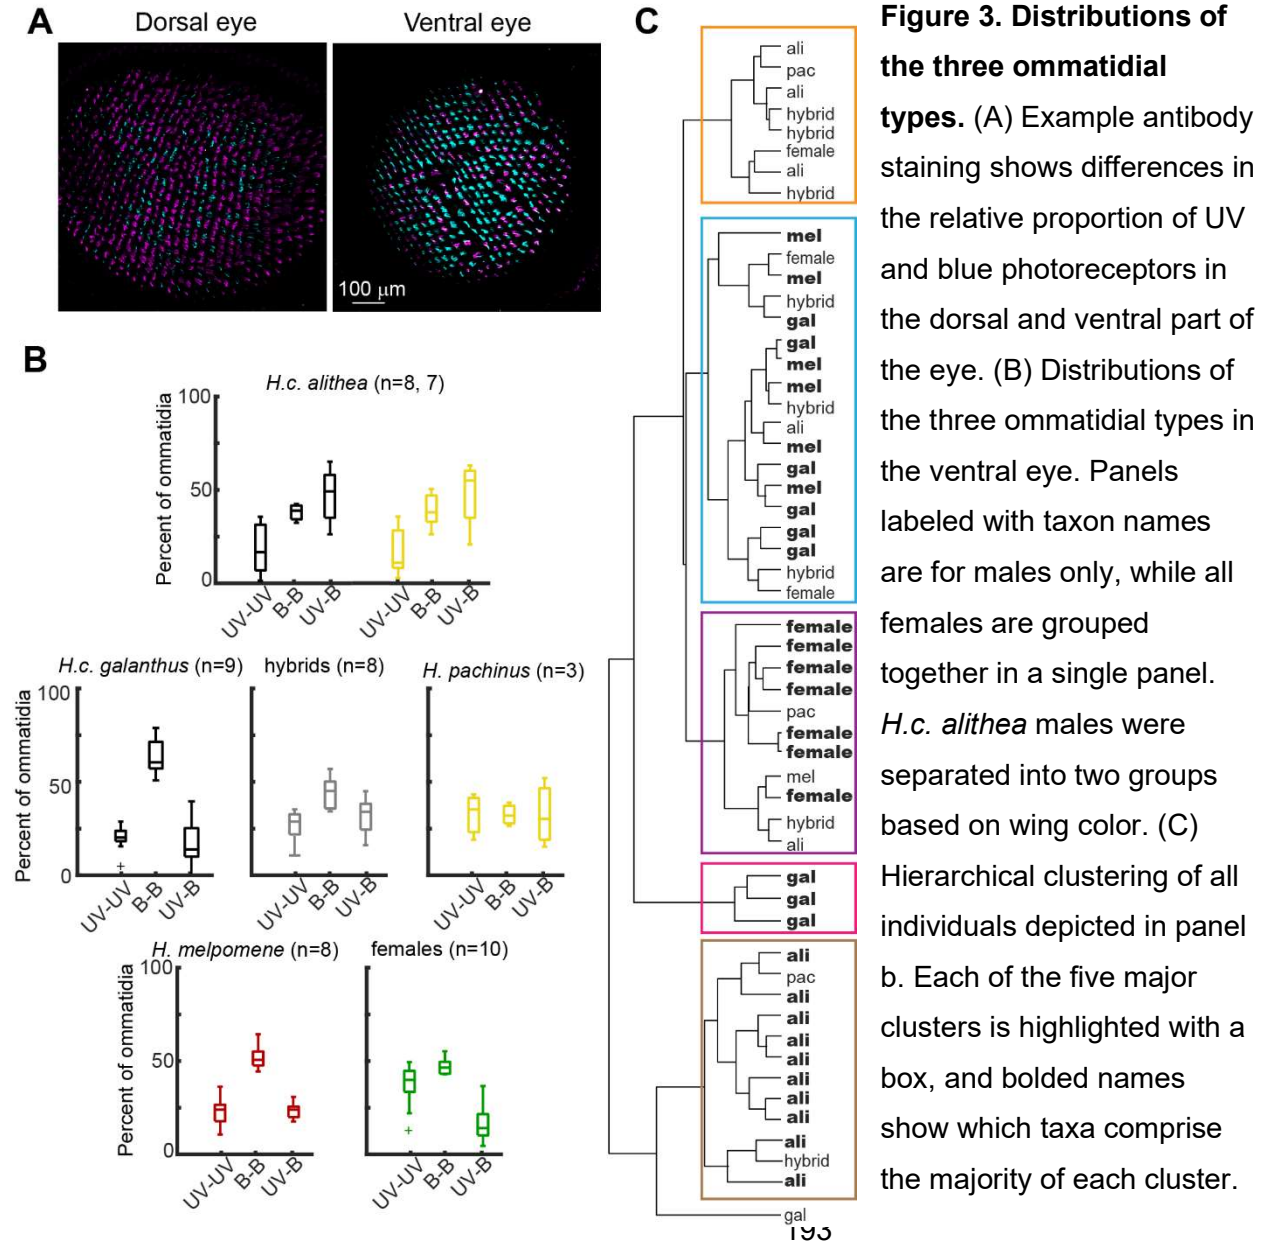

**Figure 3. Distributions of the three ommatidial types.** (A) Example antibody staining shows differences in the relative proportion of UV and blue photoreceptors in the dorsal and ventral part of the eye. (B) Distributions of the three ommatidial types in the ventral eye. Panels labeled with taxon names are for males only, while all females are grouped together in a single panel. *H.c. alithea* males were separated into two groups based on wing color. (C) Hierarchical clustering of all individuals depicted in panel b. Each of the five major clusters is highlighted with a box, and bolded names show which taxa comprise the majority of each cluster.

194 *pachinus* did not cluster together but appeared to have relatively equal numbers of all three  
 195 ommatidial types. Hybrids also did not cluster together, but similar to UV opsin expression, the  
 196 distribution appeared to be an average of the distributions observed for the parent species.  
 197 Finally, we again observed a sexual dimorphism where females of all taxa clustered together  
 198 and had eyes with few UV-B ommatidia and equal amounts of UV-UV and B-B ommatidia.

199 In contrast to the diverse expression of UV and blue opsins in the R1 and R2  
 200 photoreceptors, the R3-8 photoreceptors all express the green sensitive LW opsin. However,  
 201 *Heliconius* butterflies also have red sensitive photoreceptors derived from a combination of the  
 202 LW opsin and a red screening pigment (McCulloch et al., 2016). To assess the distribution of

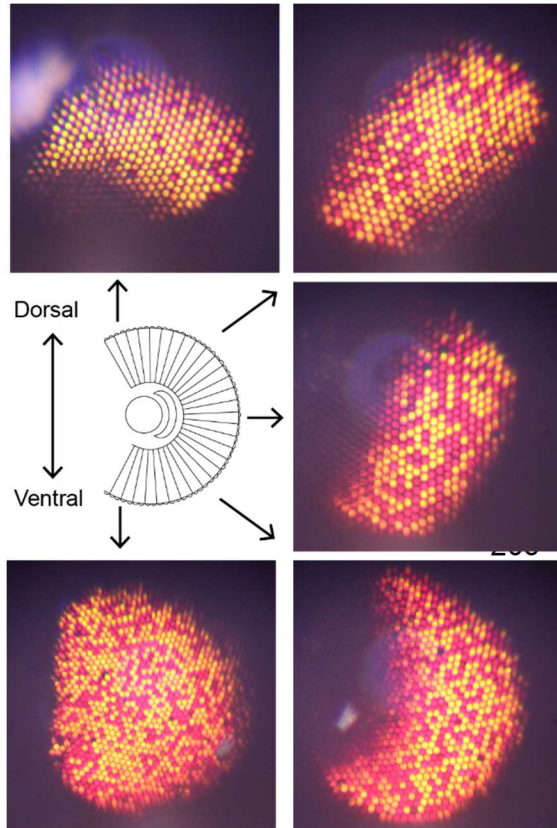

**Figure 4. Example eyeshine images.** Eyeshine shows which screening pigment is expressed in each ommatidium. We imaged eyeshine across the full dorsal-ventral axis of each butterfly eye. Shown here are a subset of the eyeshine images for an *H. pachinus* male.

212

213 green and red sensitive photoreceptors, we performed eyeshine experiments that reveal which  
214 ommatidia express this red pigment. We imaged the eyeshine across the entire dorsal-ventral  
215 axis of the eye (Fig. 4), averaging  $3,686.9 \pm 758.2$  ommatidia per butterfly, which is  
216 approximately 30% of a *Heliconius* eye (Seymoure et al., 2015). Images from the ventral part of  
217 the eye had nearly twice as many ommatidia per photo compared to the rest of the eye ( $476.8 \pm$   
218  $124.8$  vs.  $242.5 \pm 37.7$ ,  $p < 0.001$ ). This difference reflects an increase in the spatial resolution  
219 of the ventral eye compared to the middle and dorsal part of the eye (Stavenga et al., 2001;  
220 Takeuchi et al., 2006).

221 In agreement with eyeshine in other *Heliconius* species, every butterfly had red eyeshine  
222 indicative of screening pigment expression and yellow eyeshine indicative of no pigment  
223 expression (Fig. 4) (Belušič et al., 2021; McCulloch et al., 2016; Stavenga, 2002; Zaccardi et al.,  
224 2006). We first measured ommatidia reflectance spectra using a monochromatic camera paired  
225 with a series of monochromatic light stimuli (Fig. 5A, see methods). For short wavelengths,  
226 yellow ommatidia began reflecting at  $\sim 560$  nm, which shifted significantly to  $\sim 600$  nm for red  
227 ommatidia (Fig. 5B). Yellow ommatidia also had a peak intensity that was  $17.2 \pm 13.1\%$  greater  
228 than red ommatidia ( $p < 0.001$ ). The long wavelength cutoff is associated with the reflective



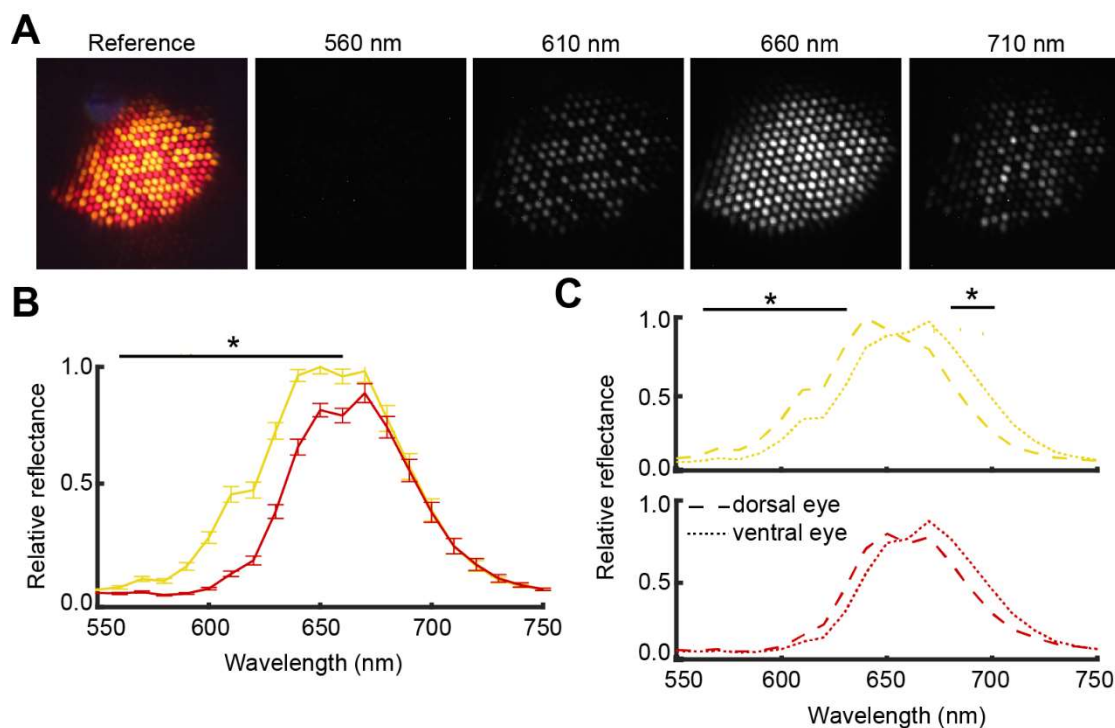

229

230 **Figure 5: Screening pigment reflectance spectra.** (A) The reflectance spectrum of individual  
231 ommatidia was measured using monochromatic light and a monochromatic camera. Images  
232 shown are for the middle part of the eye for an *H. galanthus* male. (B) Average reflectance  
233 spectrum for red and yellow ommatidia ( $n = 24$ , split evenly across species and sex, but no F1  
234 hybrids were included). Asterisk indicates where yellow and red reflectance are significantly  
235 different ( $p < 0.05$ , t-test with Holm-Bonferroni correction). Error bars show mean  $\pm$  SEM. (C)  
236 Red and yellow ommatidia were separated into the dorsal, middle, and ventral part of the eye.  
237 The middle part of the eye was intermediate compared to the dorsal and ventral eye and not  
238 shown for clarity. Asterisks indicate where reflectance is significantly different across the three  
239 regions of the eye ( $p < 0.05$ , ANOVA with Holm-Bonferroni correction).

240

241 tapetum rather than pigment expression (Ribi, 1979) and did not differ between red and yellow  
242 ommatidia, with reflectance absent above  $\sim 730$  nm (Fig. 5B). Reflectance spectra did not vary  
243 across groups, but it did vary across the eye (Fig. 5C). Moving across the dorsal-ventral axis of  
244 the eye, yellow ommatidia progressively shifted towards longer wavelengths without affecting  
245 the shape of the reflectance spectrum ( $p < 0.05$  with Holm-Bonferroni correction). A similar but  
246 non-significant shift was observed for red ommatidia (Fig. 5C). Reflectance intensity, in contrast,  
247 did not vary with eye region ( $p = 0.2235$ ).

248

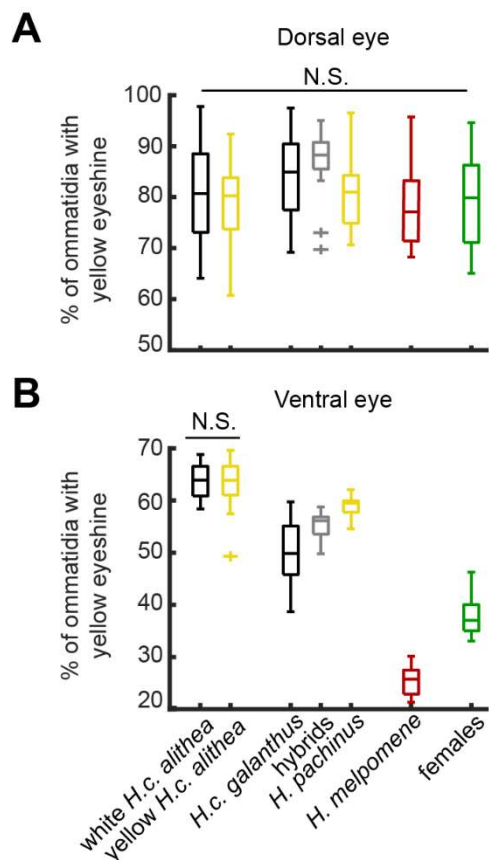

**Figure 6: Distribution of eyeshine colors.** Boxplots show the proportion of ommatidia that have a yellow eyeshine in the (A) dorsal and (B) ventral eye. Boxes with a taxon name are all males, and all females are grouped together in the final box. No significant differences were detected in the dorsal eye, while all pairwise comparisons except white vs. yellow *H.c. alithea* were significantly different in the ventral eye ( $n = 15, 15, 15, 14, 14, 15, 15$ ,  $p < 0.05$ , t-test with Holm-Bonferroni correction).

256

257

258

259

260

261

262

263

264

265

266

267

268

269

270

271

272

Mirroring the antibody staining results, we also observed differences in the eyeshine distribution between the dorsal and ventral eye. The dorsal eye predominantly had a yellow eyeshine (Fig. 6A), and this did not vary with taxon ( $F_{4,101} = 1.16$ ,  $p = 0.33$ ) or sex ( $F_{1,101} = 3.62$ ,  $p = 0.06$ ). In contrast, the proportion of yellow ommatidia in the ventral half of the eye (Fig. 6B) varied significantly with taxon ( $F_{4,102} = 41.76$ ,  $p < 0.001$ ), sex ( $F_{1,102} = 127.01$ ,  $p < 0.001$ ), and the taxon X sex interaction ( $F_{4,102} = 37.8$ ,  $p < 0.001$ ). A relatively sharp transition separated the eye into a dorsal ~25% and ventral ~75%, with the decrease in yellow ommatidia occurring across approximately 40 rows of ommatidia.

For the ventral eye eyeshine, we again observed a sexual dimorphism where male eyes varied and female eyes did not (Fig. 6B). First, female eyeshine was significantly different from males for all taxa ( $p < 0.001$  for all pairwise t-tests with Holm-Bonferroni correction). Further, females did not vary with taxon ( $F_{5,14} = 0.41$ ,  $p = 0.83$ ), with  $37.9 \pm 3.6\%$  of ventral ommatidia having a yellow eyeshine (Fig. 4B). For males, all groups were significantly different from each other ( $p < 0.05$  with Holm-Bonferroni correction) except for *H.c. alithea*, which did not differ between wing colors (yellow eyeshine proportion =  $63.5 \pm 4.2\%$ ,  $p = 0.90$ , Fig. 4B). *H. pachinus* (yellow =  $58.9 \pm 1.9\%$ ) had significantly more yellow ommatidia than its sister species *H.c.*

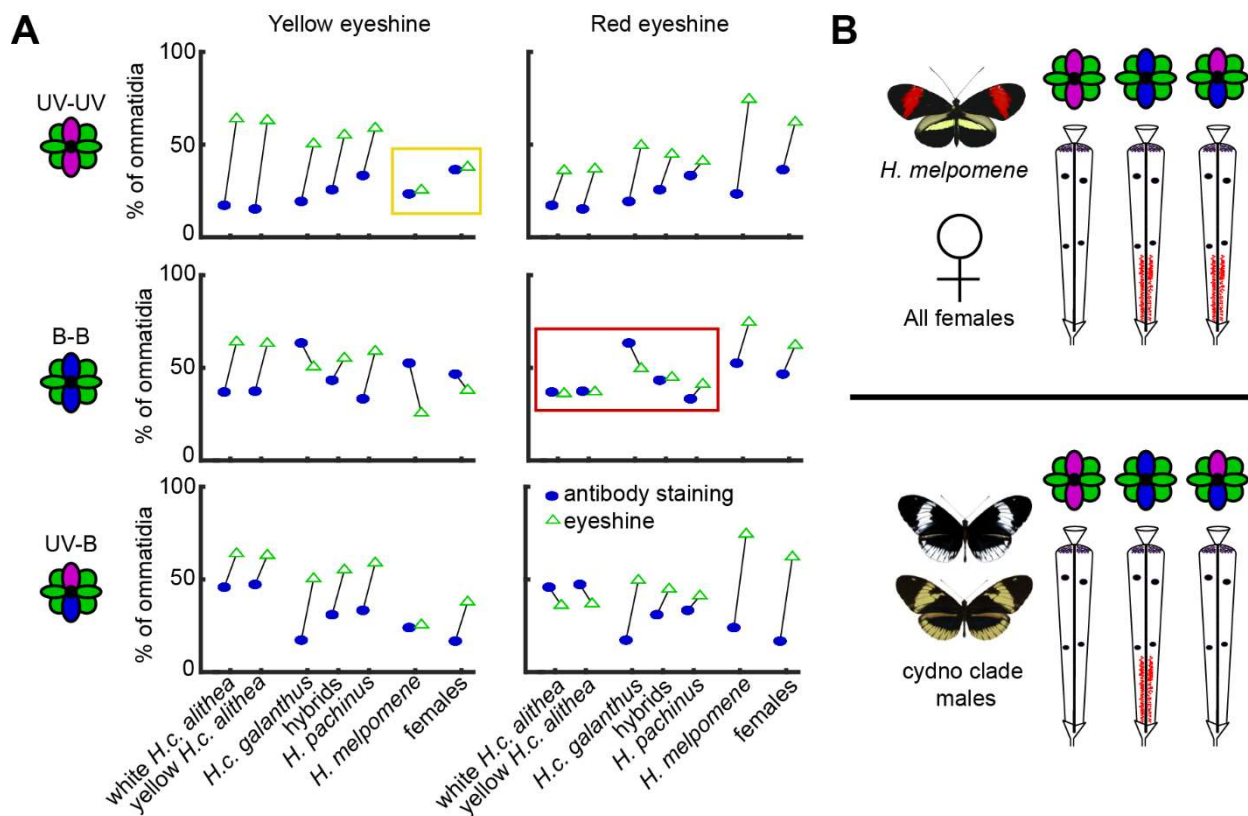

273  
 274 **Figure 7. Relationship between screening pigment and ommatidial type.** (A) Comparison of  
 275 eyeshine proportions (columns, Fig. 5b) with each ommatidial type (rows, Fig. 3b). Each panel  
 276 shows a side-by-side comparison of the proportion of ommatidia with a particular eyeshine color  
 277 and opsin expression profile. Similar proportions within a panel suggest a one-to-one  
 278 correspondence across the eye. The two boxes highlight which arrangements parsimoniously  
 279 minimize the differences for each group. (B) Diagram shows the likely relationship between  
 280 ommatidial type and eyeshine color. Ancestrally, UV-UV ommatidia have a yellow eyeshine,  
 281 while B-B and UV-B both have a red eyeshine. *Cydo* clade females likely retain this  
 282 arrangement, but males appeared to convert UV-B ommatidia from red to yellow.

283  
 284 *galanthus* (yellow =  $50.5 \pm 6.1\%$ ), and the hybrid offspring of these two were intermediate  
 285 (yellow =  $55.2 \pm 2.5\%$ ). In contrast to these *cydo* clade butterflies, *H. melpomene* males had  
 286 mostly red ommatidia in the ventral eye (yellow =  $25.5 \pm 2.9\%$ ).

287 Finally, each ommatidial type is typically associated with the same eyeshine color across  
 288 the eye such that one eyeshine color corresponds to two ommatidial types. However, comparing  
 289 our antibody staining (Fig. 3B) to eyeshine (Fig. 5B) suggested this relationship differs across  
 290 taxa (Fig. 7). For *H. melpomene* and females, the proportion of UV-UV ommatidia matched the  
 291 proportion of yellow eyeshine (Fig. 7A), consistent with results from the dorsal eye. However,

292 this relationship could not explain *cydno* clade males, which had low numbers of UV-UV  
293 ommatidia and high proportions of yellow eyeshine (Fig. 7A). Instead, iterating across all  
294 possible arrangements, the most parsimonious explanation for these data is that, for all  
295 butterflies, UV-UV has a yellow eyeshine and B-B has a red eyeshine (Fig. 7B). In contrast, UV-  
296 B differs, with females retaining an ancestral red eyeshine and *cydno* clade males switching to a  
297 yellow eyeshine.

298

## 299 Discussion

300

301 Overall, our results showed sex-limited variability in eye organization for every metric we  
302 examined, with male eyes varying and female eyes appearing similar across taxa. Every  
303 butterfly had three ommatidial types (UV-UV, B-B, and UV-B) that matched the inferred  
304 ancestral state of all butterflies (Briscoe, 2008), in contrast to the six retinal mosaics detected  
305 across all of *Heliconius* (McCulloch et al., 2017). This similarity in the overarching organization  
306 of *cydno* clade eyes may be due to a lack of selective pressure to change, but considering the  
307 differences we observed, may also suggest this aspect of eye organization is less amenable to  
308 rapid evolution. The differences we observed included which UV opsin was expressed, the  
309 relative distribution of the three ommatidial types, the distribution of a red screening pigment,  
310 and the relationship between ommatidial type and screening pigment.

311 The first difference in eye organization we detected across these closely related  
312 butterflies was which UV opsin was expressed in UV photoreceptors. UV1 is ancestral, while  
313 UV2 is a genus-specific adaptation hypothesized to improve the discriminability of a genus  
314 specific yellow pigment used for wing coloration (3-hydroxy-dl-kynurenine, 3-OHK) from the  
315 yellow pigments used by sympatric, non-*Heliconius* mimics (Briscoe et al., 2010; Bybee et al.,  
316 2012). *H.c. galanthus* males strongly prefer to approach and court white females and this was  
317 the only taxon where males primarily expressed UV1 (Kronforst et al., 2006). The other *cydno*  
318 clade males studied here either prefer yellow females or court both colors equally (Chamberlain  
319 et al., 2009; Kronforst et al., 2006), so the observed UV2 expression would serve to enhance  
320 conspecific detection in these butterflies.

321 Many *Heliconius* species have both UV1 and UV2 expressing photoreceptors, but the  
322 co-expression of both within single photoreceptors was previously only detected in female *H.*  
323 *doris* butterflies (McCulloch et al., 2017). In contrast to a previous report showing UV1  
324 expression in *H. melpomene* (McCulloch et al., 2017), we detected co-expression of both UV1  
325 and UV2. The most likely explanation for this discrepancy is the antibodies designed for our

326 study had a higher sensitivity, as both our own qPCR (Fig. 2B) and RNA-Sequencing data from  
327 the previous report (McCulloch et al., 2017) observed UV2 mRNA at levels ~3X lower than UV1.  
328 Since we did not detect UV2 in any females, it is unlikely our results were due to non-specific  
329 staining. Co-expression was consistently detected in hybrids that occur rarely in nature, but we  
330 also detected this co-expression in a more limited subset of *H.c. alithea* and *H.c. galanthus*  
331 males. Other *Heliconius* species have both UV1 and UV2 photoreceptors, and this co-  
332 expression may serve a similar adaptive function within the phylogenetic constraint that *cydno*  
333 clade butterflies have only three ommatidial types (Finkbeiner and Briscoe, 2021; McCulloch et  
334 al., 2017).

335         Across all of our experiments, we detected a sexual dimorphism where male eyes varied  
336 and female eyes did not, suggesting a role in a dimorphic behavior. One possibility is that  
337 female eyes are optimized for host plant detection and oviposition behavior. Color vision is  
338 important to oviposition in other butterflies, and red sensitive photoreceptors can shift  
339 preference towards leaves that appear green rather than yellow to humans (Kelber, 1999;  
340 Prokopy and Owens, 1983). Further, all *Heliconius* butterflies specialize on vines in the genus  
341 *Passiflora*, suggesting all of the females studied here make similar egg-laying decisions.  
342 Nonetheless, female eyes do vary across the genus (McCulloch et al., 2017), which may reflect  
343 differences in the specific *Passiflora* species each *Heliconius* species preferentially uses or  
344 other selective pressures.

345         Rather than a role in a dimorphic behavior such as courtship, the differences we  
346 observed in males may be related to differences in their natural light environments (Lythgoe,  
347 1979; Sondhi et al., 2021). Males have variable courtship preferences for females with white or  
348 yellow wings, but the differences we report here cannot explain this variability (VanKuren et al.,  
349 unpublished). In particular, white and yellow *H.c. alithea* have different courtship preferences  
350 (Chamberlain et al., 2009) but were nearly identical in every analysis. Instead, differences in the  
351 relative abundance of different photoreceptor types (Anderson et al., 2017; Bloch, 2015; Fuller  
352 et al., 2003), photoreceptor spectral sensitivities (Cummings, 2007; Terai et al., 2006; Torres-  
353 Dowdall et al., 2017), and filters functionally similar to butterfly screening pigments (Cronin et  
354 al., 2001) have all been linked to differences in light environment in both vertebrates and  
355 invertebrates. Here, the ommatidial type distributions (Fig. 3) showed that *H.c. alithea* had the  
356 most divergent organization, even compared to the outgroup *H. melpomene*. Additionally, *H.c.*  
357 *alithea* lives in Ecuador, in contrast to all other butterflies in this study which were from Costa  
358 Rica, so the observed variability may reflect differences in habitat structure or ambient light

359 levels in these two locations, such as differences in elevation due to the Andes (Dell'Aglio et al.,  
360 2022; Sondhi et al., 2021).

361 Finally, our results suggest an evolutionary change in the relationship between  
362 ommatidial type and screening pigment in *cydno* clade males. A direct test of this hypothesis  
363 was not possible because the antibody staining protocol washes away the screening pigments.  
364 The adaptive value of this change is unclear, but the primary effect should be to decrease the  
365 number of red sensitive photoreceptors in *cydno* clade males. This may again be related to  
366 adapting *H. cydno* males to the local environment (Cronin et al., 2001; Lythgoe, 1979), while  
367 females and red-winged *H. melpomene* males might benefit from the increased number of red  
368 sensitive photoreceptors for egg-laying and conspecific detection, respectively.

369 Comparative studies of sensory systems often show that the periphery can evolve  
370 rapidly (Bendesky and Bargmann, 2011), either to support specific behaviors (Auer et al., 2020;  
371 Keller et al., 2007) or as an adaptation to the statistics of its natural environment (Fasick and  
372 Robinson, 2000; Osorio and Vorobyev, 2008; Regan et al., 2001; Torres-Dowdall et al., 2017;  
373 Touhara and Vosshall, 2009). Our results showing several diverse and sexually dimorphic  
374 features of eye organization suggest *Heliconius cydno* clade eyes evolved to support both of  
375 these adaptive functions. Although less pronounced than the differences observed across  
376 distantly related species, our complementary approach of focusing on a group of closely related  
377 taxa highlights the value and importance of a zoomed-in view for better understanding visual  
378 ecology and the evolution of visual systems.

379

## 380 **Methods**

### 381 *Animals*

382

383 The butterflies used in this study were housed in a greenhouse at the University of Chicago that  
384 was regularly supplemented with new butterflies from breeders located in Ecuador (*H.c. alithea*)  
385 and Costa Rica (*H.c. galanthus* and *H. melpomene*). *H. pachinus* and hybrids were reared in  
386 Panama and transported to the University of Chicago for experiments. All butterflies were at  
387 least 3 days old at the time of experiments.

388

### 389 *Antibody staining*

390

391 Butterflies were decapitated into 0.01 M phosphate buffered saline (PBS) where eyes were  
392 dissected using forceps. Eyes were fixed at room temperature for 15 minutes in 4%

393 paraformaldehyde in PBS. Fixed eyes were cryoprotected in a 25% sucrose in PBS solution  
394 overnight at 4°C. Eyes were then frozen in Tissue Tek O.C.T., sectioned at 14 µm on a cryostat,  
395 and placed on slides to dry overnight.

396 Cross sections of the distal eye were immunostained with antibodies specific to blue and  
397 UV sensitive opsins. The anti-blue opsin antibody was generated against the peptide  
398 INHPRYRAELQKRLPC in rabbits and was a gift from Michael Perry (Perry et al., 2016). Since  
399 *Heliconius* butterflies have both a UV1 and UV2 opsin (Briscoe et al., 2010), we generated new  
400 antibodies specific to each (GenScript). For UV1, the antibody was generated in guinea pigs  
401 against the peptide GLDSADLAVVPEC. For UV2, the antibody was generated in mouse against  
402 the peptide GLSSAELEFIPEC. To stain sections, slides were first washed in chilled acetone for  
403 5 minutes, 2X10 minutes in 0.01 PBS, 2X10 minutes in 0.3% Triton X-100 in 0.01 M PBS  
404 (PBST), 1X5 minutes in 1% sodium dodecyl sulfate in PBST, and 3X10 minutes in PBST. Slides  
405 were then blocked for 1 hour in 1% bovine serum albumin in PBST. Primary antibody was  
406 applied overnight at 4°C in 1:300 dilutions. The following day, slides were washed 5X10 minutes  
407 in PBST before applying the secondary antibody. Secondary antibodies (Abcam) were diluted  
408 1:2000 in blocking solution and applied to the slides for 2 hours at room temperature. These  
409 antibodies were goat anti-rabbit Alexafluor 488, donkey anti-guinea pig 555, and donkey anti-  
410 mouse Alexafluor 647. After staining, slides were finally washed 5X10 minutes in PBST and  
411 stored in Polymount (Fisher Scientific). Eye slices were imaged using a Zeiss LSM 510 confocal  
412 microscope using a 20X objective.

413

#### 414 *Quantification of ommatidial types*

415

416 We quantified the distribution of the three ommatidial types by counting the number of  
417 UV-UV, B-B, and UV-B ommatidia in each slice with an automated program. We first generated  
418 three binary masks for each slice, with one for UV staining, one for blue staining, and one for  
419 the merged image. Ommatidia were automatically identified using the MATLAB function  
420 *bwareafilt* on the binary merged image. We overlaid the ommatidium boundaries on the binary  
421 UV and blue images and defined the ommatidium as UV or blue positive if at least 15% of the  
422 pixels were stained for the opsin. This threshold minimized variability, but results were not  
423 qualitatively affected by different values.

424 We controlled for the quality of our automated program in two ways. First, we visually  
425 counted ommatidia in 12 sections and compared results, finding less than 4.9% differences in  
426 ommatidial type across all sections. Second, we averaged the measurements across 2-4

427 sections per eye. Across all eyes, the proportions of each ommatidial type differed by an  
428 average of  $3.8 \pm 3.7\%$ .

429 To compare the distributions across groups, we used hierarchical clustering of the  
430 ommatidial types. Each of the three types were used as different dimensions, with each  
431 individual as a unique data point. We clustered based on the Euclidean distance using an  
432 average linkage function, which maximized the cophenetic correlation ( $r = 0.77$ ). Results and  
433 conclusions were not affected when using alternative distances or linkage functions.

434

#### 435 *qPCR*

436

437 Eyes were dissected from a butterfly and immediately placed in RNA-later and stored at  
438  $-80^{\circ}\text{C}$ . Prior to RNA extraction eyes were repeatedly washed in PBS. RNA was extracted and  
439 converted to cDNA using a Qiagen RT-PCR kit. Expression levels for UV1 and UV2 were  
440 assayed using SYBR green. UV1 primers were 5'-CGCTCACTGTGTGCTTCCTCTT-3' and 5'-  
441 AGTCTTGCAAGCTACCGCGG-3'. UV2 primers were 5'-TACCGTGTGCTTCCTTTATGTTG-3'  
442 and 5'-ACCCTTGCAAGCGATCGCAG-3'.

443

#### 444 *Eyeshine*

445

446 Eyeshine images were collected using a custom built epi-fluorescent microscope  
447 following a published design (Stavenga, 2002). White light (DH-2000S, Ocean Optics) entered  
448 the microscope vertically where the beam was expanded to fill the imaging objective using two  
449 lenses placed confocally (40 and 80 mm, Edmund Optics). A half-silver mirror directed the light  
450 through a 20X, 0.4 NA objective (Zeiss LD-Plan-Neofluar) that was focused on the eye of a  
451 butterfly. After reflecting off the tapetum at the base of an ommatidium, light re-entered the  
452 horizontal arm of the microscope where it was magnified using 80 and 20 mm lenses placed  
453 confocally with each other. The eyeshine was then photographed using a digital camera  
454 equipped with an infinity focused lens (Canon EOS Rebel T5).

455 For each experiment, a butterfly was restrained in a custom collar with beeswax and  
456 placed on a rotating platform near the focal point of the imaging lens. The eyeshine was brought  
457 into focus using three linear actuators. The butterfly was dark adapted for at least one minute  
458 before each image. After each image, the butterfly was rotated to a new, non-overlapping  
459 position along the dorsal-ventral axis of the eye.



460 We quantified the eyeshine distribution by counting the number of red and yellow  
461 ommatidia in each photo. Each image was analyzed blind to taxon, sex, and location along the  
462 dorsal-ventral axis of the eye. A randomly selected 20% of the eyeshine images were included  
463 twice to ensure repeatability of the count, finding a maximum of a 2.6% difference in the  
464 proportion of yellow ommatidia counted. To calculate the proportion of yellow ommatidia in the  
465 dorsal eye, we combined the two dorsal-most images. For the ventral eye, we combined counts  
466 from the ventral half of the photos, rounded down. Results were not affected combining different  
467 numbers of photos.

468

#### 469 *Eyeshine spectral reflectance*

470

471 We measured the spectral reflectance of individual ommatidia using the same epi-  
472 fluorescent microscope. After taking a reference image, we then rerouted the white light through  
473 a monochromator (MonoScan-2000, Ocean Optics) and replaced the digital camera with a  
474 monochromatic camera (Prosilica GX1050, Allied Vision Technologies). Measuring an accurate  
475 reflectance spectrum required controlling light intensity across different wavelengths. We first  
476 used neutral density filters (Thorlabs) to minimize differences in the number of photons per  
477 second that entered the microscope. We then scaled the shutter time for each wavelength such  
478 that each exposure would contain the same number of photons. Tests using a mirror in place of  
479 a butterfly showed this procedure was effective at equalizing photon flux.

480 The reflectance spectrum was measured from 550 to 750 nm in 10 nm steps.  
481 Preliminary experiments showed no reflectance outside this range. After orienting the butterfly,  
482 we bleached the eye with white light for 10 minutes. Each stimulus was  $1.0 \times 10^{15}$  photons,  
483 which was an average shutter time of  $6.6 \pm 1.1$  seconds. We performed control experiments  
484 where we compared images collected at the beginning and end of a 10-minute exposure, which  
485 confirmed that the low intensity of monochromatic light was unable to induce corneal adaptation.  
486 For each butterfly, we measured the spectral reflectance for an image from the dorsal, middle,  
487 and ventral part of the eye.

488 We analyzed the spectral reflectance of individual ommatidia using ImageJ (Schindelin  
489 et al., 2012). Images were imported as a z-stack, which allowed us to manually select each  
490 ommatidium as the same region of interest across photos. Each ommatidium was identified as  
491 red or yellow by overlaying the reference eyeshine image. The reflectance at each wavelength  
492 was then defined as the average pixel intensity within the selected region of interest. Images

493 were 8 bit (0-255), and ommatidia were excluded from further analysis if the peak intensity was  
494 less than 125 or greater than 250.

495

496

#### 497 **Acknowledgements**

498 We would like to thank Daniel Baleckaitis for his help with immunostaining, Laura Southcott for  
499 collecting and breeding animals, and Doekele Stavenga and Primoz Pirih for valuable  
500 discussions and technical development.

#### 501 **Competing interests.**

502 The authors have no competing interests to declare.

#### 503 **Funding**

504 This work was supported by NSF EAPSI 1515295 and a Dubner Fellowship to NPB, a  
505 University of Chicago Big Ideas Generator seed award to SEP, a University of Chicago BSD  
506 Pilot Award to SEP and MRK, and NIH R35 GM131828, NSF grant IOS-1452648 and NSF  
507 grant IOS-1922624 to MRK.

#### 508 **Data Accessibility**

509 All of the data presented here are available from the Dryad Digital Repository at  
510 <https://datadryad.org/stash/dataset/doi:10.5061/dryad.5hqbzkh7v>.

511

512

#### 513 **References**

- 514 Anderson C, Reiss I, Zhou C, Cho A, Siddiqi H, Mormann B, Avelis CM, Deford P, Bergland A,  
515 Roberts E, Taylor J, Vasiliauskas D, Johnston RJ. 2017. Natural variation in stochastic  
516 photoreceptor specification and color preference in *Drosophila*. *eLife* **6**:e29593.  
517 doi:10.7554/eLife.29593
- 518 Arikawa K. 2003. Spectral organization of the eye of a butterfly, *Papilio*. *J Comp Physiol A*  
519 **189**:791–800. doi:10.1007/s00359-003-0454-7
- 520 Arikawa K, Stavenga D. 1997. Random array of colour filters in the eyes of butterflies. *Journal of*  
521 *Experimental Biology* **200**:2501–2506. doi:10.1242/jeb.200.19.2501
- 522 Arikawa K, Wakakuwa M, Qiu X, Kurasawa M, Stavenga DG. 2005. Sexual Dimorphism of  
523 Short-Wavelength Photoreceptors in the Small White Butterfly, *Pieris rapae crucivora*. *J*  
524 *Neurosci* **25**:5935–5942. doi:10.1523/JNEUROSCI.1364-05.2005
- 525 Auer TO, Khallaf MA, Silbering AF, Zappia G, Ellis K, Álvarez-Ocaña R, Arguello JR, Hansson  
526 BS, Jefferis GSXE, Caron SJC, Knaden M, Benton R. 2020. Olfactory receptor and  
527 circuit evolution promote host specialization. *Nature* **579**:402–408. doi:10.1038/s41586-  
528 020-2073-7
- 529 Belušič G, Ilić M, Meglič A, Pirih P. 2021. Red-green opponency in the long visual fibre  
530 photoreceptors of brushfoot butterflies (Nymphalidae). *Proceedings of the Royal Society*  
531 *B: Biological Sciences* **288**:20211560. doi:10.1098/rspb.2021.1560

- 532 Bendesky A, Bargmann CI. 2011. Genetic contributions to behavioural diversity at the gene-  
533 environment interface. *Nat Rev Genet* **12**:809–820. doi:10.1038/nrg3065
- 534 Blackiston D, Briscoe AD, Weiss MR. 2011. Color vision and learning in the monarch butterfly,  
535 *Danaus plexippus* (Nymphalidae). *Journal of Experimental Biology* **214**:509–520.  
536 doi:10.1242/jeb.048728
- 537 Bloch NI. 2015. Evolution of opsin expression in birds driven by sexual selection and habitat.  
538 *Proceedings of the Royal Society B: Biological Sciences* **282**:20142321.  
539 doi:10.1098/rspb.2014.2321
- 540 Briscoe AD. 2008. Reconstructing the ancestral butterfly eye: focus on the opsins. *Journal of*  
541 *Experimental Biology* **211**:1805–1813. doi:10.1242/jeb.013045
- 542 Briscoe AD, Bybee SM, Bernard GD, Yuan F, Sison-Mangus MP, Reed RD, Warren AD,  
543 Llorente-Bousquets J, Chiao C-C. 2010. Positive selection of a duplicated UV-sensitive  
544 visual pigment coincides with wing pigment evolution in *Heliconius* butterflies. *PNAS*  
545 **107**:3628–3633. doi:10.1073/pnas.0910085107
- 546 Briscoe AD, Chittka L. 2001. The Evolution of Color Vision in Insects. *Annual Review of*  
547 *Entomology* **46**:471–510. doi:10.1146/annurev.ento.46.1.471
- 548 Bybee SM, Yuan F, Ramstetter MD, Llorente-Bousquets J, Reed RD, Osorio D, Briscoe AD.  
549 2012. UV Photoreceptors and UV-Yellow Wing Pigments in *Heliconius* Butterflies Allow  
550 a Color Signal to Serve both Mimicry and Intraspecific Communication. *The American*  
551 *Naturalist* **179**:38–51. doi:10.1086/663192
- 552 Chamberlain NL, Hill RI, Kapan DD, Gilbert LE, Kronforst MR. 2009. Polymorphic Butterfly  
553 Reveals the Missing Link in Ecological Speciation. *Science* **326**:847–850.  
554 doi:10.1126/science.1179141
- 555 Chen P-J, Arikawa K, Yang E-C. 2013. Diversity of the Photoreceptors and Spectral Opponency  
556 in the Compound Eye of the Golden Birdwing, *Troides aeacus formosanus*. *PLoS ONE*  
557 **8**:e62240. doi:10.1371/journal.pone.0062240
- 558 Chen P-J, Awata H, Matsushita A, Yang E-C, Arikawa K. 2016. Extreme Spectral Richness in  
559 the Eye of the Common Bluebottle Butterfly, *Graphium sarpedon*. *Graphium sarpedon*  
560 **18**. doi:10.3389/fevo.2016.00018
- 561 Cronin TW, Caldwell RL, Marshall J. 2001. Tunable colour vision in a mantis shrimp. *Nature*  
562 **411**:547–548. doi:10.1038/35079184
- 563 Cummings ME. 2007. Sensory Trade-Offs Predict Signal Divergence in Surfperch. *Evolution*  
564 **61**:530–545. doi:10.1111/j.1558-5646.2007.00047.x
- 565 Dell'Aglio DD, Mena S, Mauxion R, McMillan WO, Montgomery SH. 2022. Divergence in  
566 *Heliconius* flight behaviour is associated with local adaptation to different forest  
567 structures. *Journal of Animal Ecology* **91**:727–737. doi:10.1111/1365-2656.13675
- 568 Fasick JI, Robinson PR. 2000. Spectral-tuning mechanisms of marine mammal rhodopsins and  
569 correlations with foraging depth. *Visual Neuroscience* **17**:781–788.  
570 doi:10.1017/S095252380017511X
- 571 Finkbeiner SD, Briscoe AD. 2021. True UV color vision in a female butterfly with two UV opsins.  
572 *J Exp Biol* **224**:jeb242802. doi:10.1242/jeb.242802
- 573 Frentiu FD, Bernard GD, Sison-Mangus MP, Van Zandt Brower A, Briscoe AD. 2007. Gene  
574 Duplication Is an Evolutionary Mechanism for Expanding Spectral Diversity in the Long-  
575 Wavelength Photopigments of Butterflies. *Molecular Biology and Evolution* **24**:2016–  
576 2028. doi:10.1093/molbev/msm132
- 577 Fuller RC, Fleishman LJ, Leal M, Travis J, Loew E. 2003. Intraspecific variation in retinal cone  
578 distribution in the bluefin killifish, *Lucania goodei*. *J Comp Physiol A Neuroethol Sens*  
579 *Neural Behav Physiol* **189**:609–616. doi:10.1007/s00359-003-0435-x
- 580 Gould F, Estock M, Hillier NK, Powell B, Groot AT, Ward CM, Emerson JL, Schal C, Vickers NJ.  
581 2010. Sexual isolation of male moths explained by a single pheromone response QTL

- 582 containing four receptor genes. *Proceedings of the National Academy of Sciences*  
583 **107**:8660–8665. doi:10.1073/pnas.0910945107
- 584 Kelber A. 1999. Ovipositing butterflies use a red receptor to see green. *Journal of Experimental*  
585 *Biology* **202**:2619–2630. doi:10.1242/jeb.202.19.2619
- 586 Keller A, Zhuang H, Chi Q, Vosshall LB, Matsunami H. 2007. Genetic variation in a human  
587 odorant receptor alters odour perception. *Nature* **449**:468–472. doi:10.1038/nature06162
- 588 Koshitaka H, Kinoshita M, Vorobyev M, Arikawa K. 2008. Tetrachromacy in a butterfly that has  
589 eight varieties of spectral receptors. *Proc R Soc B* **275**:947–954.  
590 doi:10.1098/rspb.2007.1614
- 591 Kronforst MR, Young LG, Kapan DD, McNeely C, O'Neill RJ, Gilbert LE. 2006. Linkage of  
592 butterfly mate preference and wing color preference cue at the genomic location of  
593 wingless. *PNAS* **103**:6575–6580. doi:10.1073/pnas.0509685103
- 594 Lee S-G, Poole K, Jr CEL, Vickers NJ. 2016. Transplant Antennae and Host Brain Interact to  
595 Shape Odor Perceptual Space in Male Moths. *PLOS ONE* **11**:e0147906.  
596 doi:10.1371/journal.pone.0147906
- 597 Lythgoe JN. 1979. *The Ecology of Vision*. Clarendon Press.
- 598 McCulloch KJ, Osorio D, Briscoe AD. 2016. Sexual dimorphism in the compound eye of  
599 *Heliconius erato*: a nymphalid butterfly with at least five spectral classes of  
600 photoreceptor. *Journal of Experimental Biology* jeb.136523. doi:10.1242/jeb.136523
- 601 McCulloch KJ, Yuan F, Zhen Y, Aardema ML, Smith G, Llorente-Bousquets J, Andolfatto P,  
602 Briscoe AD. 2017. Sexual Dimorphism and Retinal Mosaic Diversification following the  
603 Evolution of a Violet Receptor in Butterflies. *Mol Biol Evol* **34**:2271–2284.  
604 doi:10.1093/molbev/msx163
- 605 Melin AD, Chiou KL, Walco ER, Bergstrom ML, Kawamura S, Fedigan LM. 2017. Trichromacy  
606 increases fruit intake rates of wild capuchins (*Cebus capucinus imitator*). *Proceedings of*  
607 *the National Academy of Sciences* **114**:10402–10407. doi:10.1073/pnas.1705957114
- 608 Melin AD, Kline DW, Hickey CM, Fedigan LM. 2013. Food search through the eyes of a  
609 monkey: A functional substitution approach for assessing the ecology of primate color  
610 vision. *Vision Research* **86**:87–96. doi:10.1016/j.visres.2013.04.013
- 611 Osorio D, Vorobyev M. 2008. A review of the evolution of animal colour vision and visual  
612 communication signals. *Vision Research, Vision Research Reviews* **48**:2042–2051.  
613 doi:10.1016/j.visres.2008.06.018
- 614 Perry M, Kinoshita M, Saldi G, Huo L, Arikawa K, Desplan C. 2016. Molecular logic behind the  
615 three-way stochastic choices that expand butterfly colour vision. *Nature* **535**:280–284.  
616 doi:10.1038/nature18616
- 617 Prokopy RJ, Owens ED. 1983. Visual Detection of Plants by Herbivorous Insects. *Annual*  
618 *Review of Entomology* **28**:337–364. doi:10.1146/annurev.en.28.010183.002005
- 619 Regan BC, Julliot C, Simmen B, Viénot F, Charles–Dominique P, Mollon JD. 2001. Fruits,  
620 foliage and the evolution of primate colour vision. *Philosophical Transactions of the*  
621 *Royal Society of London Series B: Biological Sciences* **356**:229–283.  
622 doi:10.1098/rstb.2000.0773
- 623 Ribi WA. 1979. Structural Differences in the Tracheal Tapetum of Diurnal Butterflies. *Zeitschrift*  
624 *für Naturforschung C* **34**:284–287. doi:10.1515/znc-1979-3-421
- 625 Schindelin J, Arganda-Carreras I, Frise E, Kaynig V, Longair M, Pietzsch T, Preibisch S,  
626 Rueden C, Saalfeld S, Schmid B, Tinevez J-Y, White DJ, Hartenstein V, Eliceiri K,  
627 Tomancak P, Cardona A. 2012. Fiji: an open-source platform for biological-image  
628 analysis. *Nat Methods* **9**:676–682. doi:10.1038/nmeth.2019
- 629 Seehausen O, Terai Y, Magalhaes IS, Carleton KL, Mrosso HDJ, Miyagi R, van der Sluijs I,  
630 Schneider MV, Maan ME, Tachida H, Imai H, Okada N. 2008. Speciation through  
631 sensory drive in cichlid fish. *Nature* **455**:620–626. doi:10.1038/nature07285

- 632 Seymoure BM, Mcmillan WO, Rutowski R. 2015. Peripheral eye dimensions in Longwing  
633 (Heliconius) butterflies vary with body size and sex but not light environment nor mimicry  
634 ring. *The Journal of Research on the Lepidoptera* **48**:10.
- 635 Sondhi Y, Ellis EA, Bybee SM, Theobald JC, Kawahara AY. 2021. Light environment drives  
636 evolution of color vision genes in butterflies and moths. *Commun Biol* **4**:1–11.  
637 doi:10.1038/s42003-021-01688-z
- 638 Stavenga D, Kinoshita M, Yang E-C, Arikawa K. 2001. Retinal regionalization and heterogeneity  
639 of butterfly eyes. *Naturwissenschaften* **88**:477–481. doi:10.1007/s001140100268
- 640 Stavenga DG. 2002. Reflections on colourful ommatidia of butterfly eyes. *Journal of*  
641 *Experimental Biology* **205**:1077–1085. doi:10.1242/jeb.205.8.1077
- 642 Takeuchi Y, Arikawa K, Kinoshita M. 2006. Color discrimination at the spatial resolution limit in a  
643 swallowtail butterfly, *Papilio xuthus*. *J Exp Biol* **209**:2873–2879. doi:10.1242/jeb.02311
- 644 Terai Y, Seehausen O, Sasaki T, Takahashi K, Mizoiri S, Sugawara T, Sato T, Watanabe M,  
645 Konijnendijk N, Mrosso HDJ, Tachida H, Imai H, Shichida Y, Okada N. 2006. Divergent  
646 Selection on Opsins Drives Incipient Speciation in Lake Victoria Cichlids. *PLOS Biology*  
647 **4**:e433. doi:10.1371/journal.pbio.0040433
- 648 Torres-Dowdall J, Pierotti MER, Härer A, Karagic N, Woltering JM, Henning F, Elmer KR, Meyer  
649 A. 2017. Rapid and Parallel Adaptive Evolution of the Visual System of Neotropical  
650 Midas Cichlid Fishes. *Mol Biol Evol* **34**:2469–2485. doi:10.1093/molbev/msx143
- 651 Touhara K, Vosshall LB. 2009. Sensing Odorants and Pheromones with Chemosensory  
652 Receptors. *Annual Review of Physiology* **71**:307–332.  
653 doi:10.1146/annurev.physiol.010908.163209
- 654 Vorobyev M, Osorio D. 1998. Receptor noise as a determinant of colour thresholds.  
655 *Proceedings of the Royal Society of London B: Biological Sciences* **265**:351–358.  
656 doi:10.1098/rspb.1998.0302
- 657 Wehner R. 1987. 'Matched filters' — neural models of the external world. *J Comp Physiol*  
658 **161**:511–531. doi:10.1007/BF00603659
- 659 Westerman EL, VanKuren NW, Massardo D, Tenger-Trolander A, Zhang W, Hill RI, Perry M,  
660 Bayala E, Barr K, Chamberlain N, Douglas TE, Buerkle N, Palmer SE, Kronforst MR.  
661 2018. Aristaless Controls Butterfly Wing Color Variation Used in Mimicry and Mate  
662 Choice. *Current Biology* **28**:3469-3474.e4. doi:10.1016/j.cub.2018.08.051
- 663 Zaccardi G, Kelber A, Sison-Mangus MP, Briscoe AD. 2006. Color discrimination in the red  
664 range with only one long-wavelength sensitive opsin. *Journal of Experimental Biology*  
665 **209**:1944–1955. doi:10.1242/jeb.02207  
666
